# Supplementary material for: Experimental hut evaluation of bednets treated with an organophosphate (chlorpyrifos-methyl) or a pyrethroid (lambdacyhalothrin) alone and in combination against insecticide-resistant Anopheles gambiae and Culex quinquefasciatus mosquitoes.
Source: Springer Nature journal article supplement (doi:10.1186/1475-2875-4-25), 2005-01-01
Supplement: Additional file 1 [file 1475-2875-4-25-s1.doc]

**Additional file 1. Summary data of *Anopheles gambiae* collected from experimental huts over 33 nights at Yaokoffikro. Numbers in the same column sharing a letter superscript do not differ significantly (P>0.05).**

| Treatment | Dose (mg/m2) | Total number | % deterred | % inside net | % bloodfed | 95% C.I. | % feeding inhibition | Mean number fed per night (rank) | % dead after 24h | 95% C.I. | Mean number dead per night  (rank) | % in exit trap | 95% C.I. |
| --- | --- | --- | --- | --- | --- | --- | --- | --- | --- | --- | --- | --- | --- |
| Control * | Untreated | 123a |  | 3.3 | 7.3af | (3.9-13.5) |  | 0.27ab (10) | 17.1a | (11.4-24.8) | 0.64ab (3) | 35.0a | (27.1-43.8) |
| Control | Untreated | 83b |  | 20.5 | 38.6be | (28.4-49.4) |  | 0.97a (11) | 10.8a | (5.7-19.5) | 0.27a (1) | 42.2ab | (32.0-53.0) |
| Chlorpyrifos-methyl | 250 | 36bc | 56.6 | 5.6 | 0d | (0-9.2) | 100 | 0.00c (1) | 69.4bc | (52.8-82.2) | 0.76b (6) | 47.2abc | (31.7-63.3) |
| Chlorpyrifos- methyl | 250** | 37bc | 55.4 | 18.9 | 21.6bef | (11.2-37.6) | 44.0 | 0.24ab (9) | 73.0bc | (56.7-84.8) | 0.82b (7) | 40.5ab | (26.1-56.8) |
| Chlorpyrifos- methyl * | 100 | 48bc | 42.2 | 10.4 | 14.6af | (7.1-27.6) | 62.2 | 0.21ac (8) | 58.3c | (44.1-71.3) | 0.85b (8) | 52.1bc | (38.2-65.7) |
| Chlorpyrifos-methyl | 100 | 50bc | 59.3 | 0 | 6.0a | (1.9-17.0) | 84.4 | 0.09ac (4) | 62.0bc | (48.0-74.3) | 0.94b (10) | 56.0bc | (42.1-69.0) |
| Lambdacy-halothrin | 18 | 34bc | 59.0 | 8.8 | 0cd | (0-10.3) | 100 | 0.00c (1) | 67.6bc | (50.5-81.1) | 0.70b (4) | 58.8bc | (41.9-73.9) |
| Lambdacy-halothrin | 18** | 24c | 71.1 | 8.3 | 16.7ae | (6.4-36.9) | 56.7 | 0.12abc (5) | 75.0bc | (54.4-88.3) | 0.55ab (2) | 58.3bc | (38.3-75.9) |
| Two-in-one | 100 CM, 18 L | 34c | 59.0 | 8.8 | 2.9a | (0.4-18.1) | 92.5 | 0.03c (3) | 67.6bc | (50.5-81.1) | 0.70ab (4) | 55.9bc | (39.2-71.4) |
| Mixture | 100 CM, 18 L | 38bc | 54.2 | 5.3 | 13.2af | (5.6-28.1) | 65.8 | 0.15abc (6) | 78.9b | (63.2-89.1) | 0.91b (9) | 44.7abc | (29.9-60.5) |
| Mixture | 25 CM, 4.5 L | 58b | 30.1 | 10.3 | 10.3af | (4.7-21.2) | 73.3 | 0.18abc (7) | 67.2bc | (54.3-78.0) | 1.18b (11) | 62.1c | (49.1-73.6) |

* intact net (unholed); all others had 80 holes cut in them to simulate damaged nets

** washed 5 times
