# Supplementary material for: Experimental hut evaluation of bednets treated with an organophosphate (chlorpyrifos-methyl) or a pyrethroid (lambdacyhalothrin) alone and in combination against insecticide-resistant Anopheles gambiae and Culex quinquefasciatus mosquitoes.
Source: Springer Nature journal article supplement (doi:10.1186/1475-2875-4-25), 2005-01-01
Supplement: Additional file 2 [file 1475-2875-4-25-s2.doc]

**Additional file 2. Summary data of *Culex* spp. collected from experimental huts over 33 nights at Yaokoffikro. Numbers in the same column sharing a letter superscript do not differ significantly (*P*>0.05).**

| Treatment | Dose (mg/m2) | Total number | % deterred | % inside net | % bloodfed | 95% C.I. | % feeding inhibition | Mean number fed per night (rank) | % dead after 24h | 95% C.I. | Mean number dead per night (rank) | % in exit trap | 95% C.I. |
| --- | --- | --- | --- | --- | --- | --- | --- | --- | --- | --- | --- | --- | --- |
| Control* | Untreated | 435a |  | 0.2q | 2.1ac | (1.1-3.9) |  | 0.27a (9) | 9.4a | (7.0-12.6) | 1.24a (2) | 41.6a | (37.1-46.3) |
| Control | Untreated | 352a |  | 8.2b | 25.0b | (20.8-29.8) |  | 2.67b (11) | 9.7a | (7.0-13.2) | 1.03a (1) | 38.9a | (34.0-44.1) |
| Chlorpyrifosmethyl | 250 | 196bc | 44.3 | 10.7b | 2.0ac | (0.8-5.3) | 92.0 | 0.12ac (3) | 76.0bd | (69.5-81.5) | 4.52b (9) | 45.9ab | (39.1-52.9) |
| Chlorpyrifos methyl | 250** | 225b | 36.1 | 10.2b | 4.0a | (2.1-7.5) | 84.0 | 0.27a (9) | 65.3c | (58.2-71.3) | 4.45b (8) | 50.7b | (44.2-57.2) |
| Chlorpyrifosmethyl* | 100 | 200bc | 43.2 | 8.0b | 3.0a\ | (1.4-6.5) | 88.0 | 0.18ac (7) | 68.5bc | (61.7-74.6) | 4.15b (7) | 50.0b | (43.1-56.9) |
| Chlorpyrifosmethyl | 100 | 203bc | 53.3 | 0a | 2.0ac | (0.7-5.1) | 92.0 | 0.12ac (3) | 65.0c | (58.2-71.3) | 4.00b (6) | 53.7b | (46.8-60.4) |
| Lambdacy-halothrin | 18 | 148c | 57.9 | 9.5b | 4.1a | (1.8-8.7) | 83.6 | 0.18ac (7) | 66.9cd | (58.9-74.0) | 3.00b (3) | 54.1b | (46.0-61.9) |
| Lambdacy-halothrin | 18** | 213bc | 39.5 | 12.7b | 0.5c | (0.1-3.3) | 98.0 | 0.12ac (3) | 70.0bc | (63.5-75.7) | 4.52b (9) | 46.0ab | (39.4-52.7) |
| Two-in-one | 100 CM, 18 L | 193bc | 45.2 | 8.3b | 1.6ac | (0.5-4.7) | 93.6 | 0.09c (1) | 62.7c | (55.7-69.2) | 3.67b (5) | 54.4b | (47.3-61.3) |
| Mixture | 100 CM, 18 L | 211bc | 40.0 | 8.1b | 1.4ac | (0.5-4.3) | 94.4 | 0.09ac (1) | 74.9bd | (68.6-80.3) | 4.79b (11) | 46.9ab | (40.3-53.7) |
| Mixture | 25 CM, 4.5 L | 186bc | 47.1 | 10.8b | 2.7ac | (1.1-6.3) | 89.2 | 0.15ac (6) | 61.8c | (54.6-68.5) | 3.48b (4) | 45.2ab | (38.2-52.4) |

* intact net (unholed); all others had 80 holes cut in them to simulate damaged nets

** washed 5 times
